# Supplementary material for: ‘But I have a cat, I have to talk to her now’ : a qualitative study on reasons for not participating in guideline-based aphasia therapy from the perspective of patients in German-speaking countries
Source: HighWire-hosted journal article supplement (doi:10.1136/bmjopen-2024-085849), 2024-12-01
Supplement: bmjopen-2024-085849supp001_data_supplement.pdf [file bmjopen-2024-085849supp001_data_supplement.pdf]

Guideline AWARE

Research question

What prevents people with aphasia from accepting or participating in the forms of care that are declared to have the highest evidence and effectiveness in the guidelines?

| Central question/ narrative impulse                                                                        | Check aspects                                                                                                                        | More specific questions                                                                                                                                                                                        | Maintaining and regulating questions                                                                                                                                                                                                     |
|------------------------------------------------------------------------------------------------------------|--------------------------------------------------------------------------------------------------------------------------------------|----------------------------------------------------------------------------------------------------------------------------------------------------------------------------------------------------------------|------------------------------------------------------------------------------------------------------------------------------------------------------------------------------------------------------------------------------------------|
| Can you briefly introduce yourself, please?                                                                | <b>Warm-up: Introduction/ description of everyday life</b><br><br>Primary disease, duration of treatment<br><br>process presentation | Are you or your relative currently receiving speech therapy, if so, for how long?<br><br>What does a typical day look like for you?                                                                            |                                                                                                                                                                                                                                          |
| If you think about the experiences you have already had in speech therapy, what did you particularly like? | <b>INTERVENTION/EXPERIENCES</b>                                                                                                      | What do you remember positively?<br><br>Which aspects were challenging?<br><br>How did you deal with it?<br><br>What could have helped in this situation?<br><br>How does the ideal therapy look like for you? | Could you tell me more about it?<br><br>And then?<br><br>How was that for you?<br><br>How do you see that?<br><br>Can you please elaborate on this?<br><br>Can you please give an example?<br><br>What do you mean by that specifically? |

|                                                                                                                                                                 |                                                                                                                                                                                                                                                                                                                 |                                                                                                                                                                                                                                                                                                                                                                                                                                                                                                                                                                                                                                              |                                                                                                                                                                                                                                                 |
|-----------------------------------------------------------------------------------------------------------------------------------------------------------------|-----------------------------------------------------------------------------------------------------------------------------------------------------------------------------------------------------------------------------------------------------------------------------------------------------------------|----------------------------------------------------------------------------------------------------------------------------------------------------------------------------------------------------------------------------------------------------------------------------------------------------------------------------------------------------------------------------------------------------------------------------------------------------------------------------------------------------------------------------------------------------------------------------------------------------------------------------------------------|-------------------------------------------------------------------------------------------------------------------------------------------------------------------------------------------------------------------------------------------------|
| <p>It is recommended that therapies should occur more often than just 45 minutes once a week. How is that for you? How often do you receive speech therapy?</p> | <p><b>INTERVENTION / CHALLENGES</b></p> <p>Which aspects influence the use of speech therapy?</p>                                                                                                                                                                                                               | <p>How satisfied are you with the current frequency? Why are you satisfied or unsatisfied? Who or what influences whether you go to therapy or not?</p> <p>Would you like more/less therapy sessions?</p> <p>What would change if you had more/less therapy sessions?</p> <p><u>If the person has no or low therapy frequency and wishes for more:</u><br/>What are the reasons for low therapy frequency?</p> <p>What must change for you to get more therapy?</p> <p>What are challenges or barriers? Have you ever tried actively to get more therapy? If yes, how did to proceed? Who did you contact? Who did you communicate with?</p> | <p>Could you tell me more about it?</p> <p>And then?</p> <p>How was that for you?</p> <p>How do you see that?</p> <p>Can you please elaborate on this?</p> <p>Can you please give an example?</p> <p>What do you mean by that specifically?</p> |
| <p>What does the ideal therapy look like for you?</p>                                                                                                           | <p><b>INTERVENTION/ NEEDS</b></p> <p><i>Check aspects: Percentage of exercise, personal conversations, resting times; use of digital tools, Invivo etc.</i></p> <p><i>Check aspects: relationship between therapist and patient, autonomy-preference-index</i></p> <p><i>Check aspects: number of words</i></p> | <p>How should the therapy ideally be structured?</p> <p>What is important to you?</p> <p>Which methods in therapy are especially important to you?</p> <p>What do you think of digital offerings for practicing independently?</p> <p>To what extent do would you like to have a say in the content of your therapy?</p> <p>Who should set the therapy priorities?</p> <p>How do you recognize the success of the therapy?</p>                                                                                                                                                                                                               | <p>Could you tell me more about it?</p> <p>And then?</p> <p>How was that for you?</p> <p>How do you see that?</p> <p>Can you please elaborate on this?</p> <p>Can you please give</p>                                                           |

3

|                                                                         |                                                                             |                                                                                                                                                                                                                                                                                                                                                                                                                                                                                                                                                                                  |                                                                                                                                                                                                                                                 |
|-------------------------------------------------------------------------|-----------------------------------------------------------------------------|----------------------------------------------------------------------------------------------------------------------------------------------------------------------------------------------------------------------------------------------------------------------------------------------------------------------------------------------------------------------------------------------------------------------------------------------------------------------------------------------------------------------------------------------------------------------------------|-------------------------------------------------------------------------------------------------------------------------------------------------------------------------------------------------------------------------------------------------|
|                                                                         |                                                                             | <p>options?</p> <p>Which information offerings would you use to be able to be able to choose the right form of therapy for you?</p> <p>Who should inform about therapy options and offerings?</p> <p>How should information about therapy options be structured?</p>                                                                                                                                                                                                                                                                                                             |                                                                                                                                                                                                                                                 |
| <p>How does the exchange with the prescribing physician take place?</p> | <p><b>INTERVENTION/ NEEDS</b><br/><i>Role of the prescribing doctor</i></p> | <p>Which occupational group does the doctor who prescribes speech therapy belong?</p> <p>What is the doctor’s attitude towards speech therapy? Did the physician ever mention anything positive or negative or even said that they wouldn’t prescribe it anymore? If yes, why so?</p> <p>Is your physician interested in the content of speech therapy? How would you evaluate this? Is it important to you, that your physician knows what happens in your therapy sessions?</p> <p>Would there be an additional value if your physician were involved in therapy planning?</p> | <p>Could you tell me more about it?</p> <p>And then?</p> <p>How was that for you?</p> <p>How do you see that?</p> <p>Can you please elaborate on this?</p> <p>Can you please give an example?</p> <p>What do you mean by that specifically?</p> |
|                                                                         | <p><b>Thanksgiving &amp; Goodbye</b></p>                                    |                                                                                                                                                                                                                                                                                                                                                                                                                                                                                                                                                                                  |                                                                                                                                                                                                                                                 |
